# Supplementary material for: Synthesis, characterization, and high temperature CO2 capture of new CaO based hollow sphere sorbents
Source: Royal Society of Chemistry journal article supplement (doi:10.1039/c3ta11369h), 2013-01-01
Supplement: c3ta11369h.pdf [file c3ta11369h.pdf]

## **Supporting information**

### **Synthesis, Characterization, and High Temperature CO<sub>2</sub> capture of New CaO based Hollow Sphere Sorbents**

**Fa-Qian Liu,\* Wei-Hua Li\*, Bao-Cheng Liu, and Rong-Xun Li**

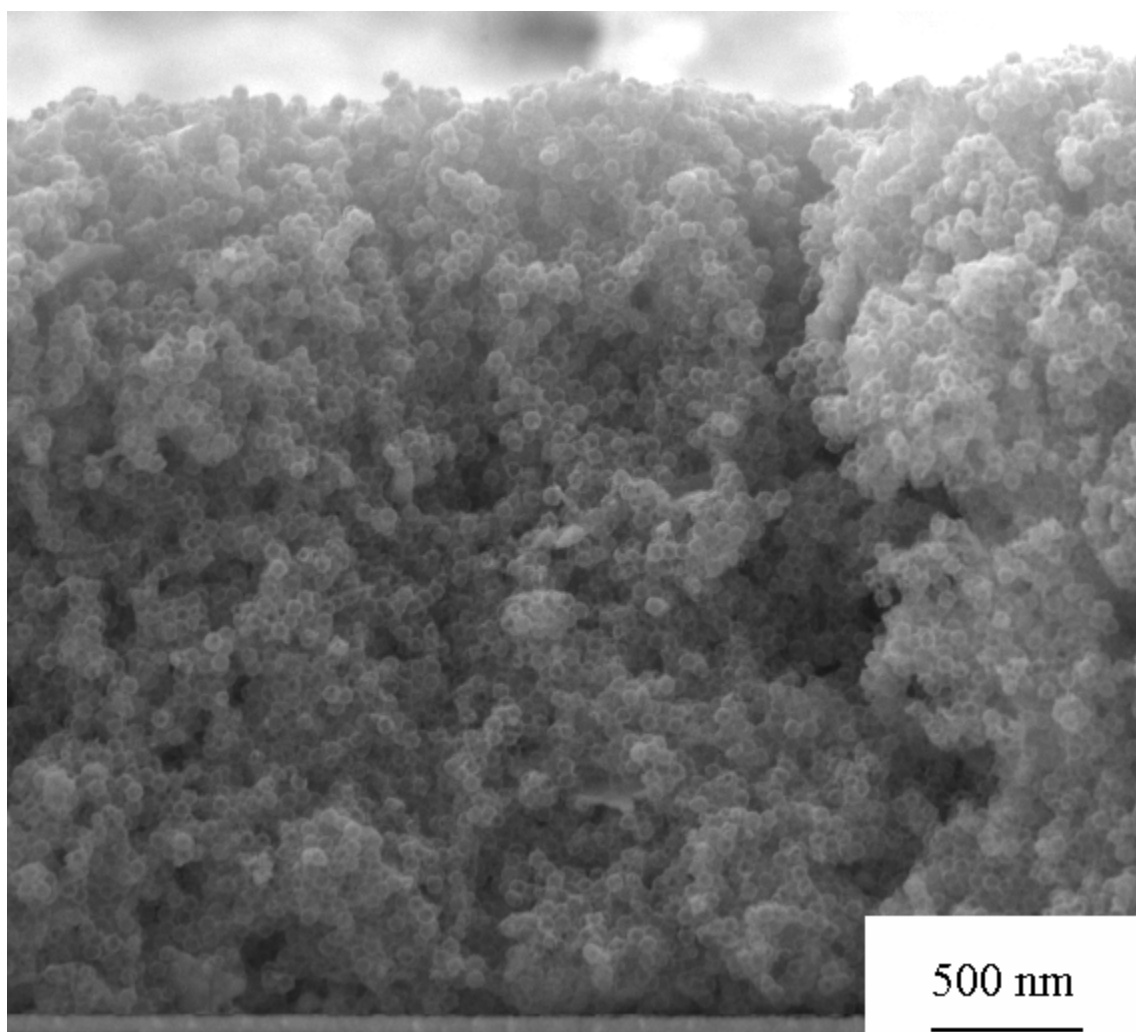

Fig. S1 SEM image of cross-section of hollow spheres stacked on the silicon substrate prepared from T1 core-shell hydrogel template.

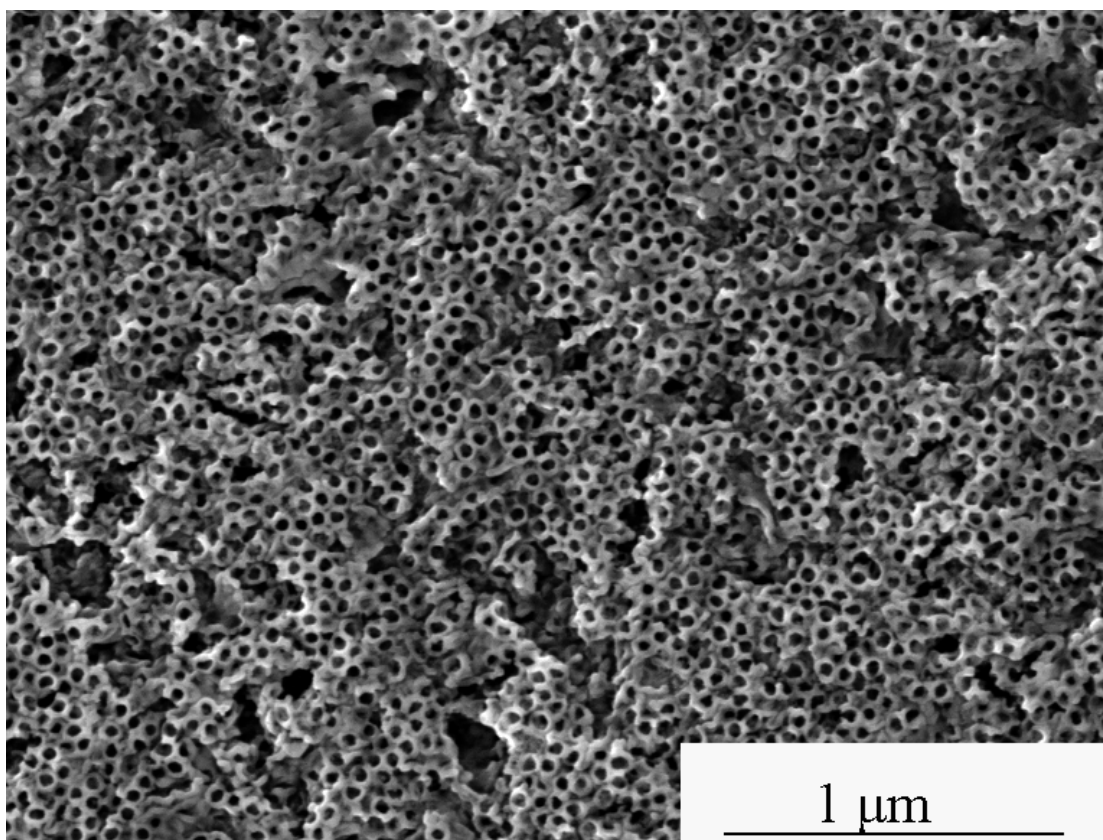

Fig. S2 porous CaO prepared from sulfonated PS spheres and  $\text{CaCl}_2 \cdot 2\text{H}_2\text{O}$  without the presence of  $\text{Al}(\text{O}-i\text{-Pr})_3$

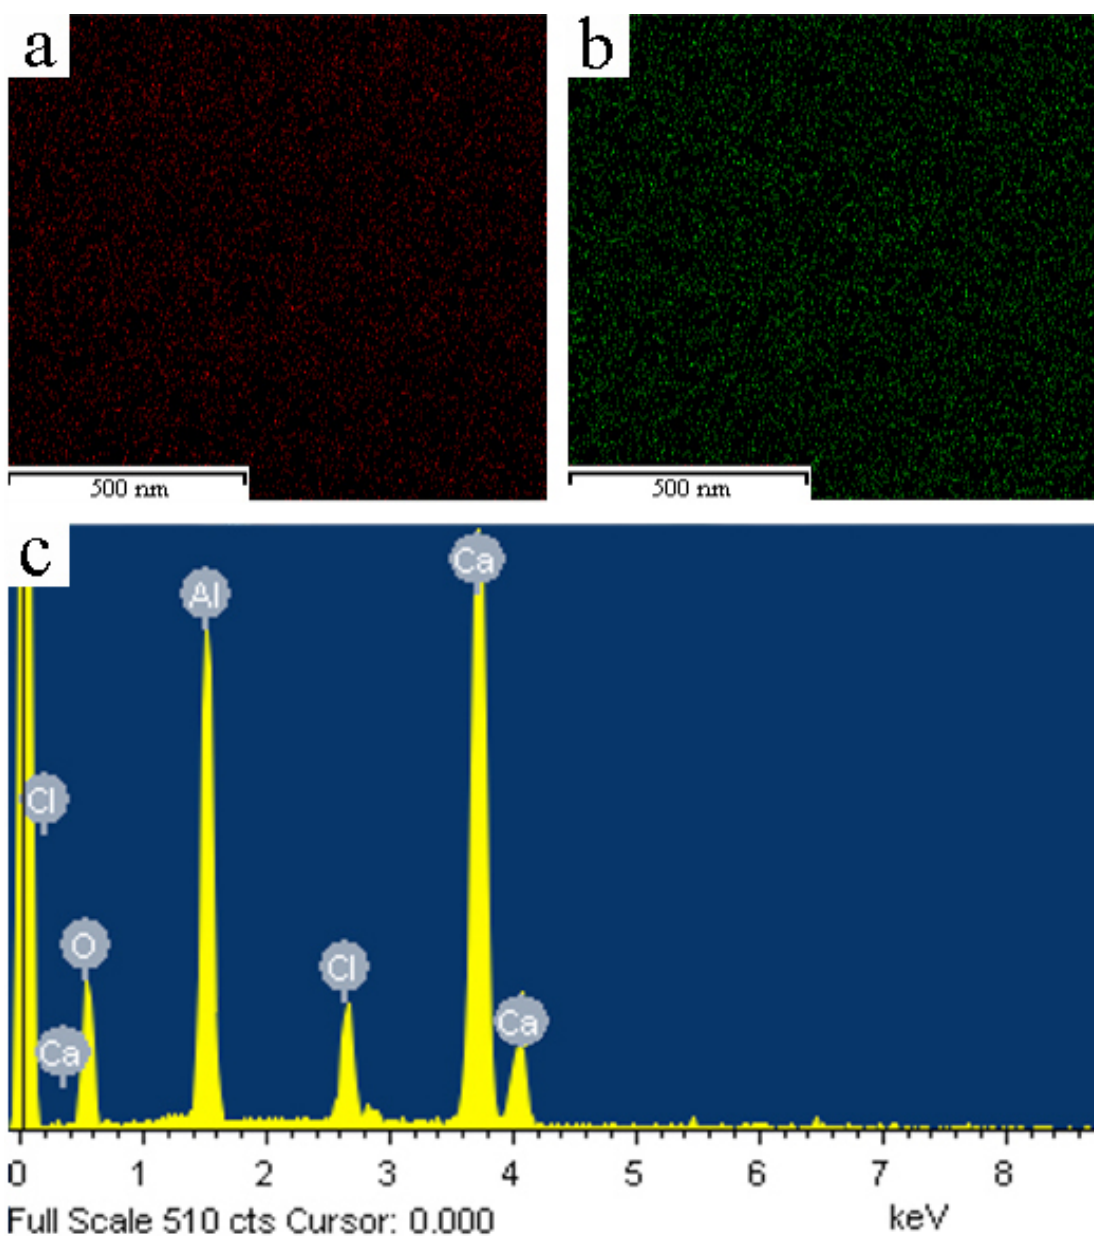

Fig. S3 (a) Ca EDS mapping image, (b) Al EDS mapping image of  $\text{CaO}/\text{Ca}_{12}\text{Al}_{14}\text{O}_{33}$  hollow sphere sorbents, and (c) their corresponding EDS profile.
